# Supplementary material
Source: publisher site journal article supplement (https://www.dovepress.com/article/303772)
Supplement: Supplementary file 1 [file get_supplementary_file.php]

|  |  |  |
| --- | --- | --- |
|  |  |  |

**Supplement figure 1. Mean changes of exploratory PD markers (A,D: hemoglobin, B, E: hematocrit, C, F: RBC) from baseline after a single intravenous (A, B and C) or subcutaneous (D, E and F) administration of CKD-11101 60 μg (test drug) or reference drug 60 μg. Bars represent standard deviations.**

**Supplement Table 1. Summary of all treatment emergent adverse events by systemic organ class**

|  | Part 1. Intravenous administration | | Part 2. Subcutaneous administration | |
| --- | --- | --- | --- | --- |
|  | CKD-11101 60 μg  (Test drug)  (n=29) | Reference drug  60 μg (n=29) | CKD-11101 60 μg  (Test drug)  (n=33) | Reference drug  60 μg (n=34) |
| Subjects with TEAE, n(%) | **8 (27.6) [16]** | **7 (24.1) [10]** | **11 (33.3) [19]** | **9 (26.5) [18]** |
| **Gastrointestinal disorders** | **2 (6.9) [3]** |  | **1 (3.0) [7]** | **3 (8.8) [3]** |
| Abdominal pain | 1 (3.4) [1] |  | 1 (3.0) [3] |  |
| Diarrhoea | 1 (3.4) [1] |  | 1 (3.0) [2] | 1 (2.9) [1] |
| Dyspepsia |  |  | 1 (3.0) [1] | 2 (5.9) [2] |
| Flatulence |  |  | 1 (3.0) [1] |  |
| Nausea | 1 (3.4) [1] |  |  |  |
| **Musculoskeletal disorders** | **2 (6.9) [2]** | **1 (3.4) [1]** | **1 (3.0) [1]** | **1 (2.9) [1]** |
| Jaw pain |  | 1 (3.4) [1] |  |  |
| Musculoskeletal pain |  |  | 1 (3.0) [1] |  |
| Myalgia | 1 (3.4) [1] |  |  |  |
| Pain neck/shoulder | 1 (3.4) [1] |  |  | 1 (2.9) [1] |
| **Nervous system disorders** | **2 (6.9) [4]** | **1 (3.4) [1]** | **3 (9.1) [3]** | **5 (14.7) [6]** |
| Dizziness | 1 (3.4) [1] |  | 1 (3.0) [1] | 2 (5.9) [2] |
| Headache | 2 (6.9) [2] | 1 (3.4) [1] | 2 (6.0) [2] | 3 (8.8) [3] |
| Paraesthesia distal | 1 (3.4) [1] |  |  |  |
| Somnolence |  |  |  | 1 (2.9) [1] |
| **Respiratory, thoracic and mediastinal disorders** | **1 (3.4) [3]** | **4 (13.8) [5]** | **6 (18.2) [6]** | **2 (5.9) [4]** |
| Common cold |  | 1 (3.4) [1] |  |  |
| Coughing | 1 (3.4) [1] |  |  | 1 (2.9) [1] |
| Feeling cold |  |  |  | 1 (2.9) [1] |
| Nasal congestion |  |  | 2 (6.0) [2] |  |
| Rhinorrhoea |  | 2 (6.9) [2] |  | 1 (2.9) [1] |
| Sputum increased | 1 (3.4) [1] |  |  |  |
| Throat irritation | 1 (3.4) [1] | 2 (6.9) [2] |  |  |
| Throat sore |  |  |  | 1 (2.9) [1] |
| Tonsillitis |  |  | 1 (3.0) [1] |  |
| Upper respiratory tract infection |  |  | 3 (9.1) [3] |  |
| **Skin and subcutaneous tissue disorders** | **3 (10.3) [3]** | **2 (6.9) [2]** | **2 (6.0) [2]** | **3 (8.8) [4]** |
| Bruise |  | 2 (6.9) [2] |  |  |
| Burn |  |  | 1 (3.0) [1] |  |
| Itching | 2 (6.9) [2] |  |  |  |
| Pruritus |  |  | 1 (3.0) [1] | 1 (2.9) [1] |
| Skin nodule |  |  |  | 2 (5.9) [2] |
| Urticaria |  |  |  | 1 (2.9) [1] |
| Wheals | 1 (3.4) [1] |  |  |  |
| **Injury, poisoning and procedural complications** | **1 (3.4) [1]** | **1 (3.4) [1]** |  |  |
| Medical device complication | 1 (3.4) [1] | 1 (3.4) [1] |  |  |

TEAE, treatment emergent adverse event

Data are presented as the number of subject (percent of total subject within treatment groups) [number of events within treatment groups]
